# Supplementary material
Source: ML conference proceedings conference paper supplement (https://openreview.net/forum?id=1YCb07JMyl)

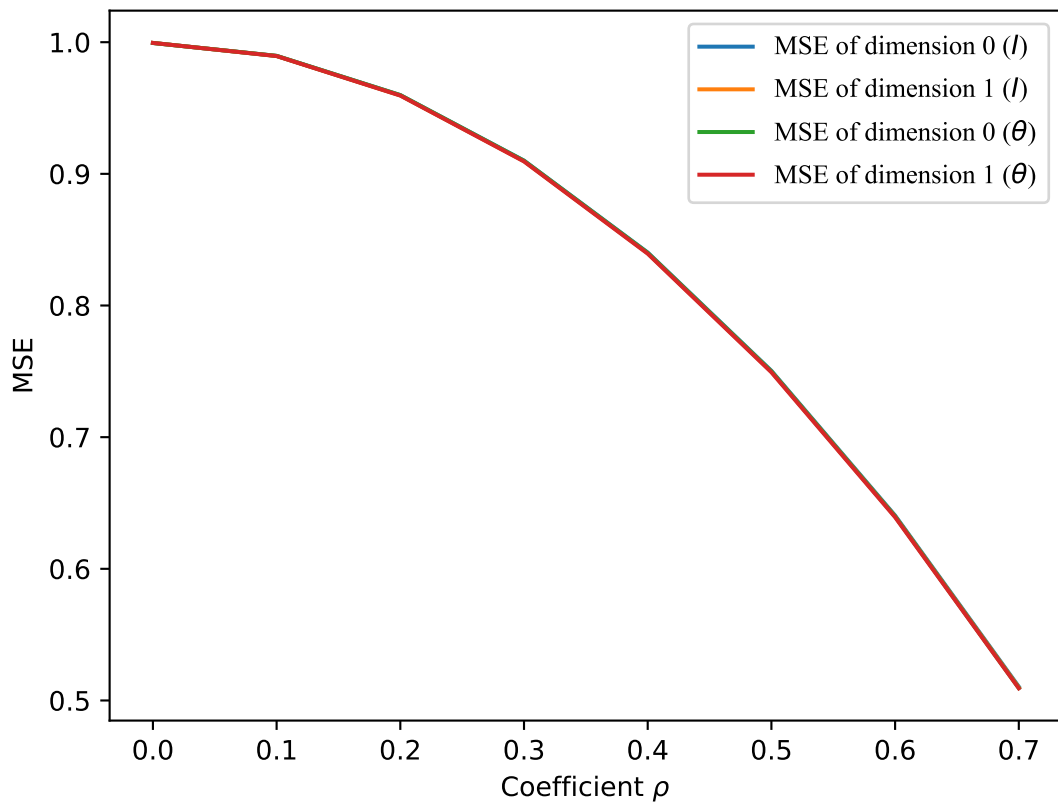

Supplement: supplementary_material [file 1_step_mse_comparison.pdf › Supplementary_Material/Code/Figures/1_step_mse_comparison.pdf]

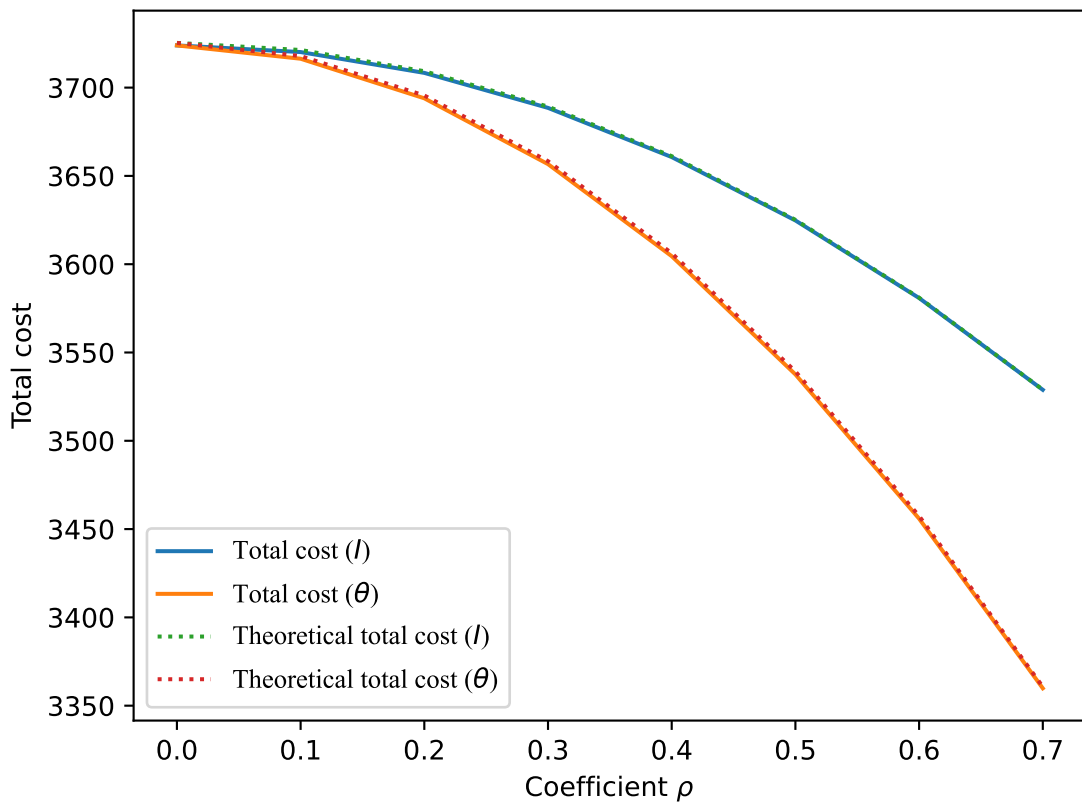

Supplement: supplementary_material [file 1_step_total_cost_comparison.pdf › Supplementary_Material/Code/Figures/1_step_total_cost_comparison.pdf]

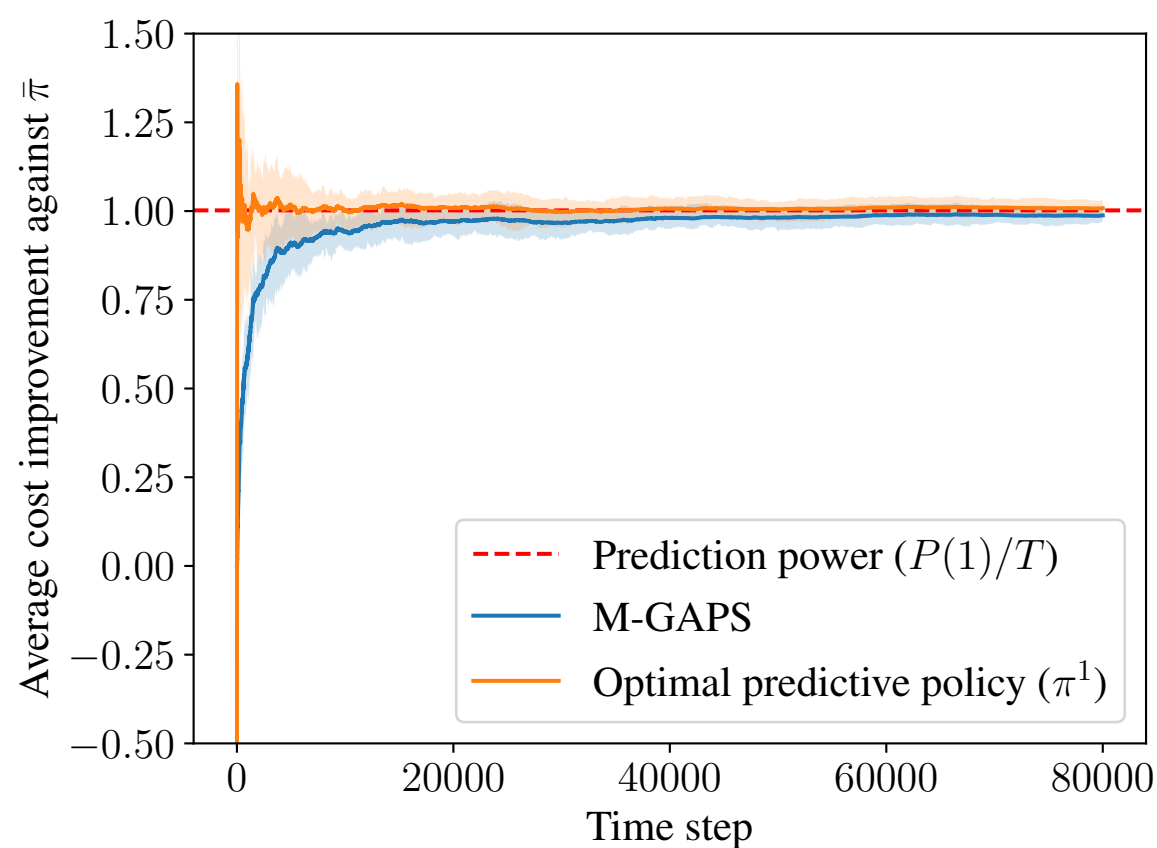

Supplement: supplementary_material [file average_cost_improvement_current_prediction_0.5.pdf › Supplementary_Material/Code/Figures/average_cost_improvement_current_prediction_0.5.pdf]

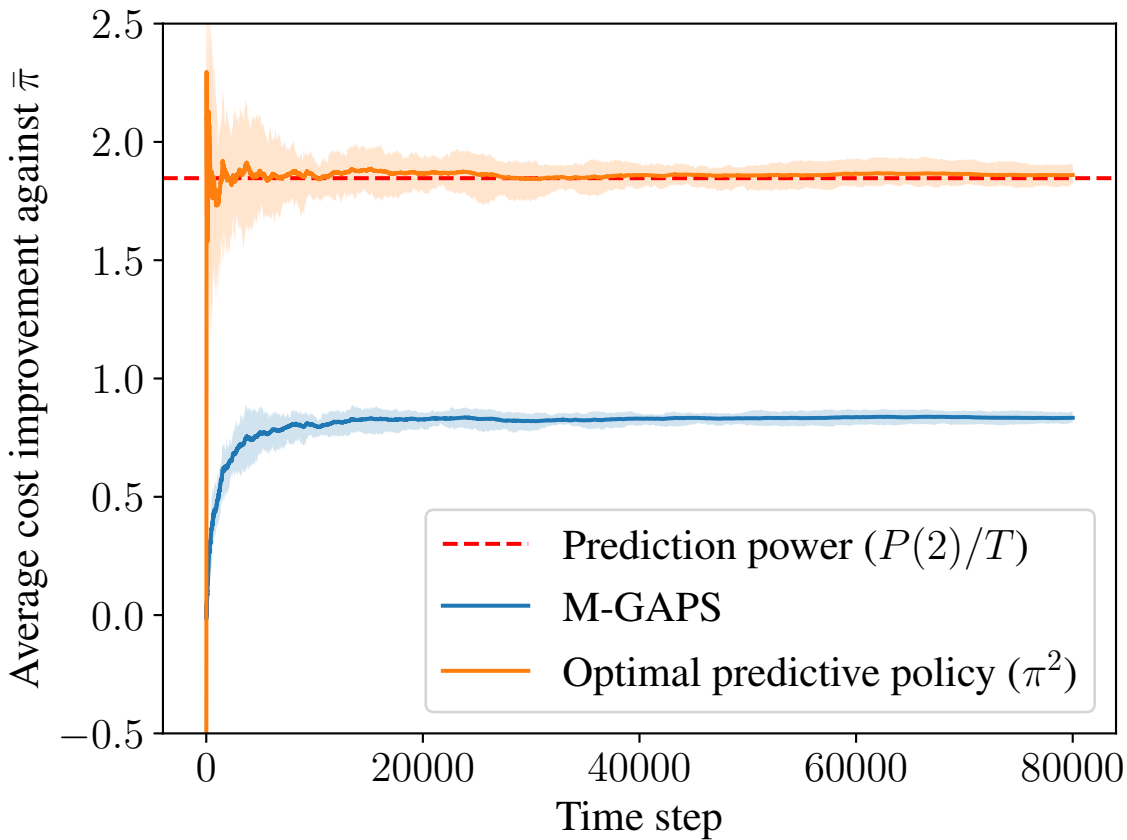

Supplement: supplementary_material [file average_cost_improvement_next_prediction_0.5.pdf › Supplementary_Material/Code/Figures/average_cost_improvement_next_prediction_0.5.pdf]

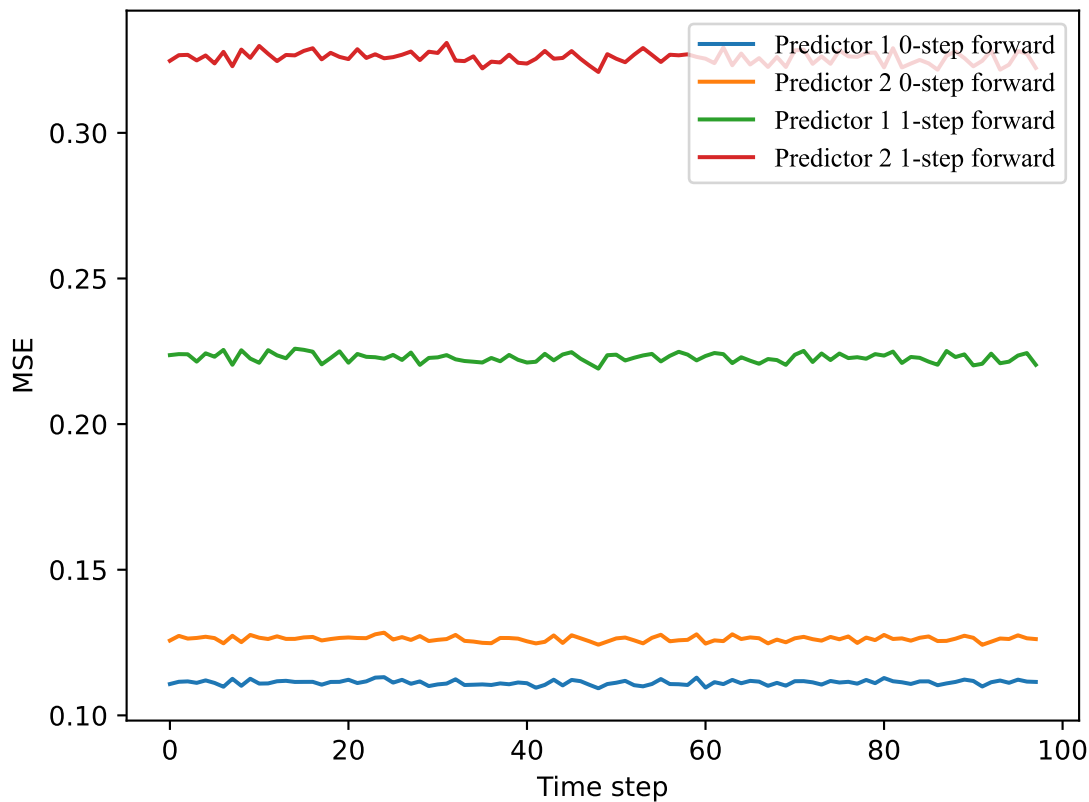

Supplement: supplementary_material [file multi_step_mse_predictor_A_B.pdf › Supplementary_Material/Code/Figures/multi_step_mse_predictor_A_B.pdf]
